# Supplementary material for: A solid-solution modulation strategy in trivalent bismuth-doped gallate phosphors for single substrate tunable emission
Source: Royal Society of Chemistry journal article supplement (doi:10.1039/d1dt02222a), 2021-01-01
Supplement: d1dt02222a1.pdf [file d1dt02222a1.pdf]

# Supporting Information

***Title:***

Solid-Solution Modulation Strategy in Trivalent Bismuth-Doped Gallate Phosphors for Single Substrate Tunable Emission

Yao Wang,<sup>a</sup> Ning Guo,<sup>a,\*</sup> Yanmei Xin,<sup>a</sup> Jing Li,<sup>a</sup> Ruizhuo Ouyang,<sup>a</sup> Baiqi Shao,<sup>b</sup> and Yuqing Miao<sup>a</sup>

<sup>a</sup> Department of Chemistry, University of Shanghai for Science and Technology, Shanghai 200093, P. R. China.

<sup>b</sup> State Key Laboratory of Rare-Earth Resource Utilization, Changchun Institute of Applied Chemistry, Chinese Academy of Sciences, Changchun 130022, P. R. China.

\*Corresponding author: Tel.: +86-21-65711344; Fax: +86-21-65711344;

E-mail: [guoning@usst.edu.cn](mailto:guoning@usst.edu.cn)

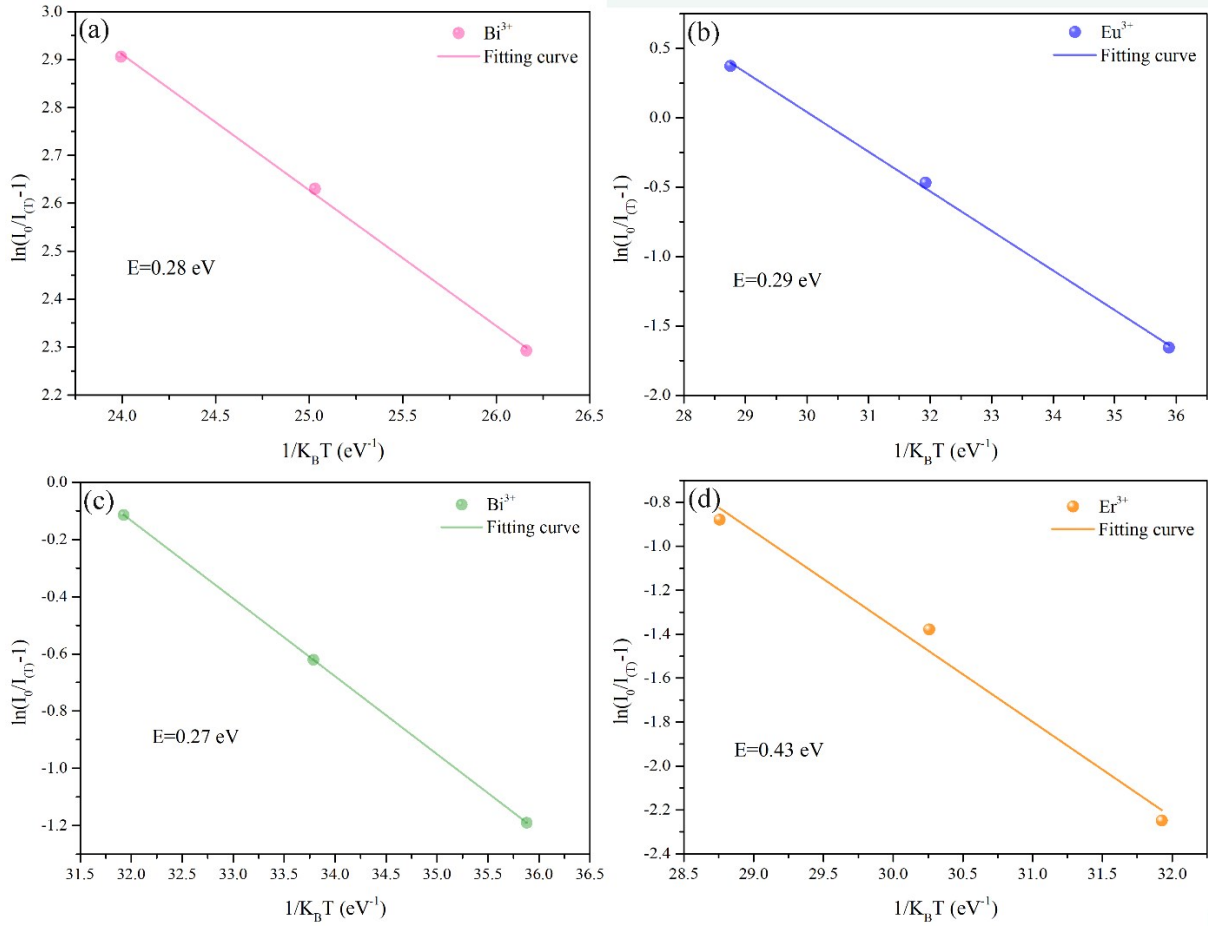

**Figure S1.** Thermal quenching activation energy fitting diagram of (a)  $\text{Bi}^{3+}$ , (b)  $\text{Eu}^{3+}$  in  $\text{SLGF}_0:0.01\text{Bi}^{3+}, 0.01\text{Eu}^{3+}$ , and (c)  $\text{Bi}^{3+}$ , (d)  $\text{Er}^{3+}$  in  $\text{SLGF}_{0.6}:0.01\text{Bi}^{3+}, 0.01\text{Er}^{3+}$ .

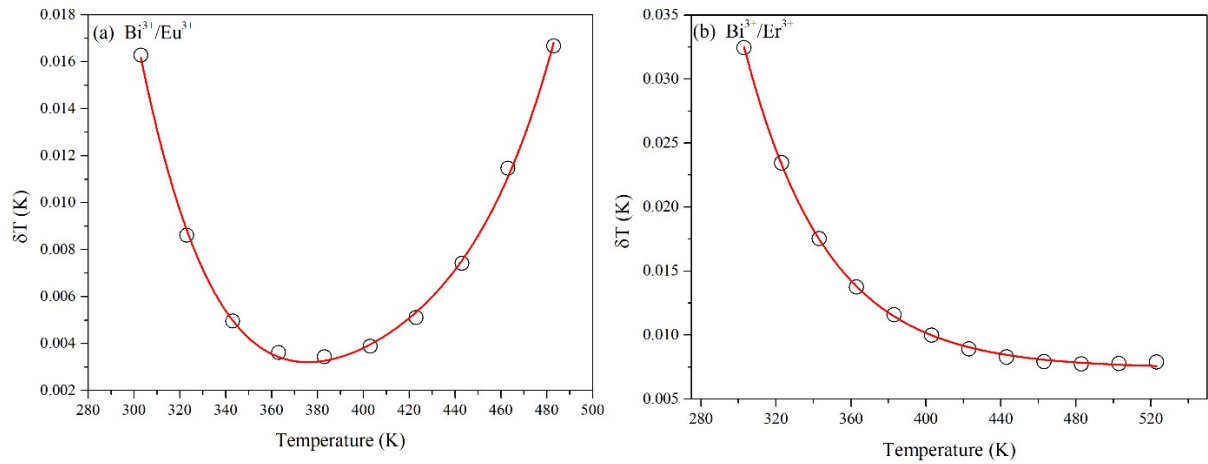

**Figure S2.** The temperature resolution of (a)  $\text{SLGF}_0:0.01\text{Bi}^{3+}, 0.01\text{Eu}^{3+}$  phosphors, (b)  $\text{SLGF}_{0.6}:0.01\text{Bi}^{3+}, 0.01\text{Er}^{3+}$  phosphors.

**Table S1.** Correlated data for Crystallography and Refinement Results for SLGF<sub>0.2</sub>:0.01Bi<sup>3+</sup> Samples.

| Parameter                   | Sr <sub>3</sub> GaO <sub>4</sub> F<br>standard crystal | SLGF <sub>0.2</sub> :0.01Bi <sup>3+</sup> |
|-----------------------------|--------------------------------------------------------|-------------------------------------------|
| Space group                 | Pbcn(60)                                               | I4/mcm                                    |
| a (Å)                       | 6.7819                                                 | 6.8982                                    |
| b (Å)                       | 6.7819                                                 | 6.8982                                    |
| c (Å)                       | 11.3662                                                | 11.2900                                   |
| $\alpha=\beta=\gamma$ (deg) | 90                                                     | 90                                        |
| V (Å <sup>3</sup> )         | 522.78                                                 | 537.236                                   |
| Units (Z)                   | 4                                                      | 4                                         |
| R <sub>p</sub> %            | -                                                      | 9.12                                      |
| R <sub>wp</sub> %           | -                                                      | 11.96                                     |
| $\chi$                      | -                                                      | 2.686                                     |

**Table S2.** CIE chromaticity coordinates corresponding to the points in Fig. 3 (d)

| x in Sr <sub>1.985+x</sub> La <sub>1-x</sub> GaO <sub>5-x</sub> F <sub>x</sub> | CIE x  | CIE y  |
|--------------------------------------------------------------------------------|--------|--------|
| 0                                                                              | 0.2091 | 0.2495 |
| 0.05                                                                           | 0.1964 | 0.2187 |
| 0.1                                                                            | 0.1846 | 0.2012 |
| 0.2                                                                            | 0.1726 | 0.1635 |
| 0.4                                                                            | 0.165  | 0.137  |
| 0.6                                                                            | 0.1579 | 0.1063 |
| 0.8                                                                            | 0.1557 | 0.0925 |
